# Supplementary material for: Comparing and Correcting Spectral Sensitivities between Multispectral Microscopes: A Prerequisite to Clinical Implementation
Source: MDPI journal article supplement (doi:10.3390/cancers15123109), 2023-06-08
Supplement: s1 [file s1]

**Table S1:** Antibodies and staining conditions for automated mIF assay. Formalin-fixed, paraffin-embedded tissues melanoma samples were stained for a mIF 8-plex assay plus DAPI.

|          |        | Primary Antibody |             |                  |                  | Secondary Antibody    |                          |                      | TSA Fluorophore     |              |                   |           |
|----------|--------|------------------|-------------|------------------|------------------|-----------------------|--------------------------|----------------------|---------------------|--------------|-------------------|-----------|
| Position | Marker | Species          | Clone       | Source           | Dilution (μg/mL) | Incubation Time (min) | Amplification Source     | Dilution (in 1x TBS) | Opal                | TSA Dilution | Excitation Filter |           |
| 1        | FoxP3  | Mouse            | 236A/E7     | abcam            | 100              | 60                    | Mouse Powervision        | Leica Biosystems     | 1:3                 | 540          | 300               | FITC      |
| 2        | CD8    | Mouse            | 4B11        | Leica Biosystems | 200              | 30                    | Opal                     | Akoya Biosciences    | None                | 570          | 150               | Cy3       |
| 3        | CD3    | Mouse            | LN10        | Leica Biosystems | 50               | 60                    | Opal                     | Akoya Biosciences    | None                | 480          | 150               | Opal 480  |
| 4        | PD1    | Rabbit           | EPR4877(2)  | abcam            | 1000             | 60                    | Rabbit Powervision       | Leica Biosystems     | 1:3                 | 650          | 250               | Cy5       |
| 5        | PDL1   | Rabbit           | SP142       | abcam            | 50               | 60                    | Rabbit Powervision       | Leica Biosystems     | 1:3                 | 520          | 250               | FITC      |
| 6        | CD163  | Mouse            | EDHu-1      | Leica Biosystems | 800              | 60                    | Rabbit Powervision       | Leica Biosystems     | 1:3                 | 690          | 150               | Cy5       |
| 7        | Sox10  | Mouse            | BC34        | BioCare Medical  | 400              | 30                    | Opal                     | Akoya Biosciences    | None                | 620          | 150               | Texas Red |
|          | S100   | Mouse            | 4C4.9       | Abnova           | 1600             |                       |                          |                      |                     |              |                   |           |
| 8        | ATPase | Rabbit           | EP1845Y     | abcam            | 100              |                       | Rabbit/Mouse Powervision | Leica Biosystems     | 1:1 (Mouse: Rabbit) | TSA-DIG      | 100               | Opal 780  |
|          | CD44   | Mouse            | DF1485      | Dako             | 100              | 30                    |                          |                      |                     | DIG-780      | 25                |           |
|          | CD45   | Mouse            | 2B11+PD7/26 | Dako             | 200              |                       |                          |                      |                     | DAPI         | 12.5              | DAPI      |

**Table S2:** Dates that each sample was scanned on the three microscopes.

| Sample   | Microscope 1 |             | Microscope 2 |             | Microscope 3 |             |
|----------|--------------|-------------|--------------|-------------|--------------|-------------|
|          | Scan 1       | Scan 2      | Scan 1       | Scan 2      | Scan 1       | Scan 2      |
| Sample 1 | Jan 6 2022   | Jan 2 2022  | Dec 6 2021   | Dec 14 2021 | Dec 22 2021  | Dec 25 2021 |
| Sample 2 | Jan 4 2022   | Dec 29 2021 | Dec 7 2021   | Dec 12 2021 | Dec 22 2021  | Dec 25 2021 |
| Sample 3 | Jan 5 2022   | Jan 1 2022  | Dec 4 2021   | Dec 12 2021 | Dec 20 2021  | Dec 24 2021 |
| Sample 4 | Jan 7 2022   | Dec 30 2021 | Dec 3 2021   | Dec 11 2021 | Dec 19 2021  | Dec 22 2021 |
| Sample 5 | Jan 5 2022   | Jan 2 2022  | Dec 5 2021   | Dec 13 2021 | Dec 21 2021  | Dec 25 2021 |
| Sample 6 | Jan 6 2022   | Jan 3 2022  | Dec 4 2021   | Dec 13 2021 | Dec 20 2021  | Dec 28 2021 |
| Sample 7 | Jan 5 2022   | Jan 2 2022  | Dec 5 2021   | Dec 14 2021 | Dec 21 2021  | Dec 25 2021 |
| Sample 8 | Jan 7 2022   | Jan 3 2022  | Dec 5 2021   | Dec 13 2021 | Dec 21 2021  | Dec 29 2021 |

**Table S3:** Number of HPFs generated for every scan of each sample used.

| Sample   | Microscope 1 |        | Microscope 2 |        | Microscope 3 |        |
|----------|--------------|--------|--------------|--------|--------------|--------|
|          | Scan 1       | Scan 2 | Scan 1       | Scan 2 | Scan 1       | Scan 2 |
| Sample 1 | 563          | 578    | 586          | 592    | 595          | 577    |
| Sample 2 | 553          | 579    | 563          | 577    | 576          | 567    |
| Sample 3 | 892          | 885    | 905          | 898    | 892          | 900    |
| Sample 4 | 659          | 662    | 680          | 669    | 680          | 667    |
| Sample 5 | 652          | 643    | 646          | 649    | 636          | 616    |
| Sample 6 | 705          | 698    | 721          | 722    | 714          | 700    |
| Sample 7 | 1010         | 1018   | 1022         | 1016   | 1006         | 999    |
| Sample 8 | 706          | 711    | 714          | 717    | 708          | 701    |
| Total    | 5740         | 5774   | 5837         | 5840   | 5807         | 5727   |

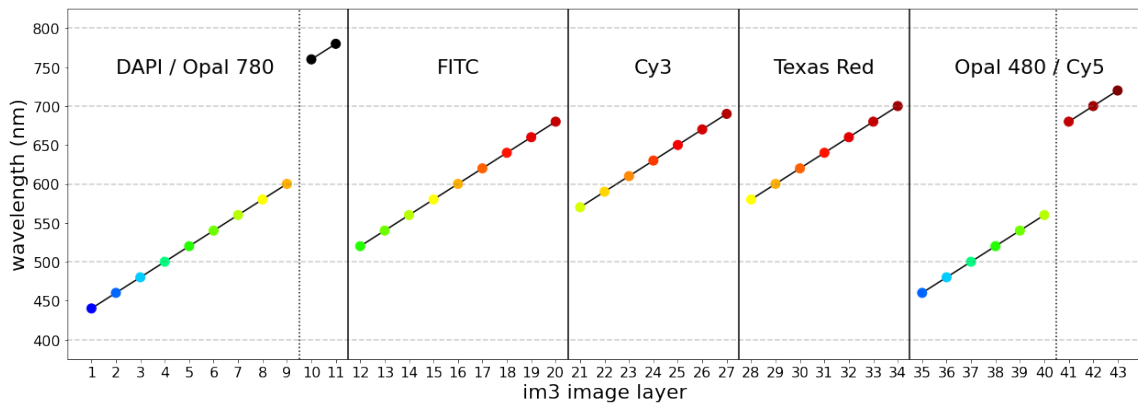

**Figure S1:** The narrow-band filter wavelengths contributing to each HPF image layer. Data points are colored by their wavelength in the visible spectrum where applicable. Divisions are shown between groups of layers imaged using different broadband filters.

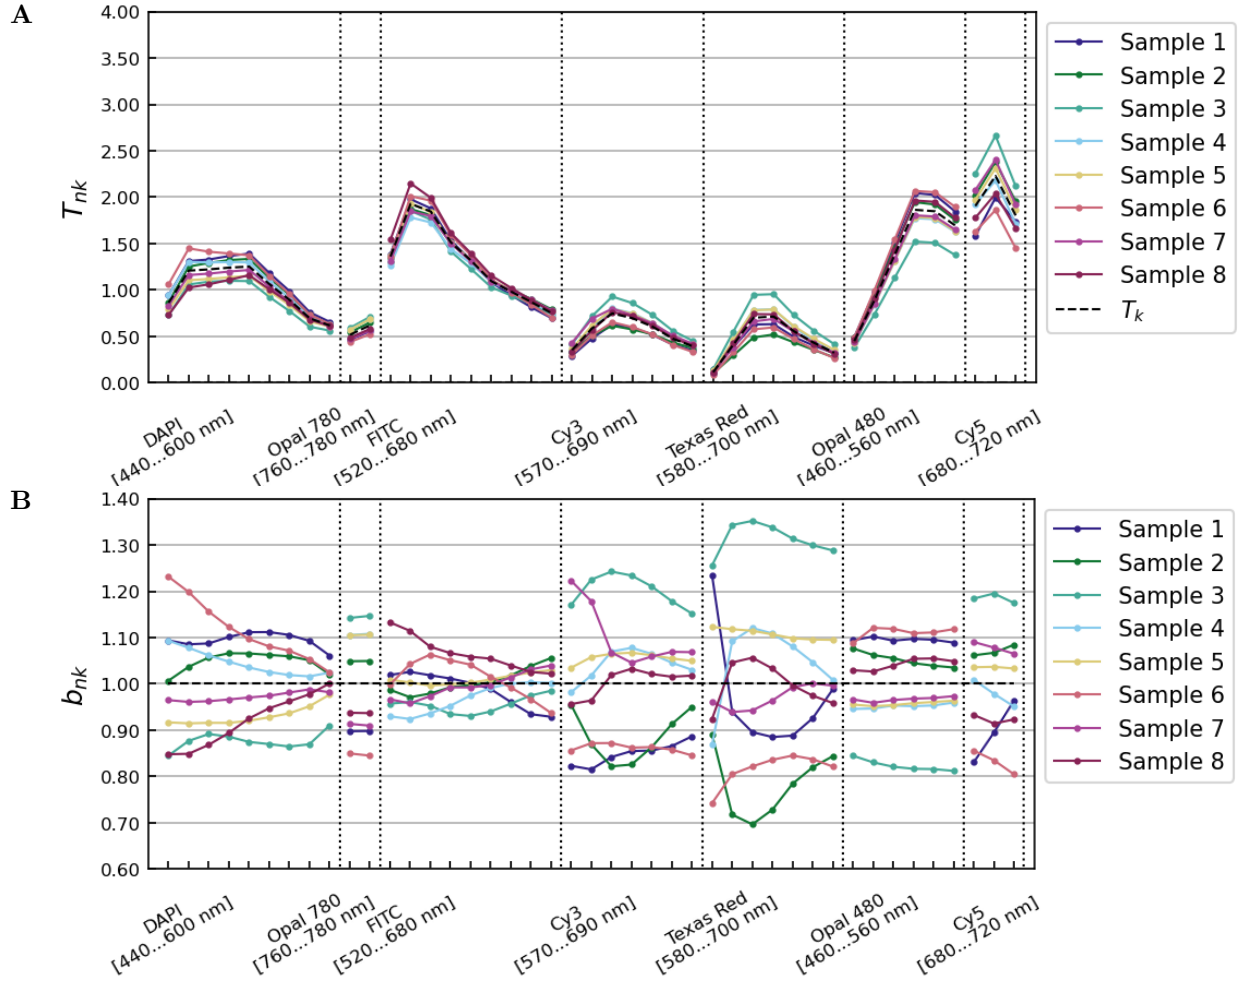

**Figure S2:** (A) The  $T_{nk}$  spectra representing relative variations about the mean ( $T_k$ ) of the set of tissue samples. (B) The  $b_{nk}$  correction factors.

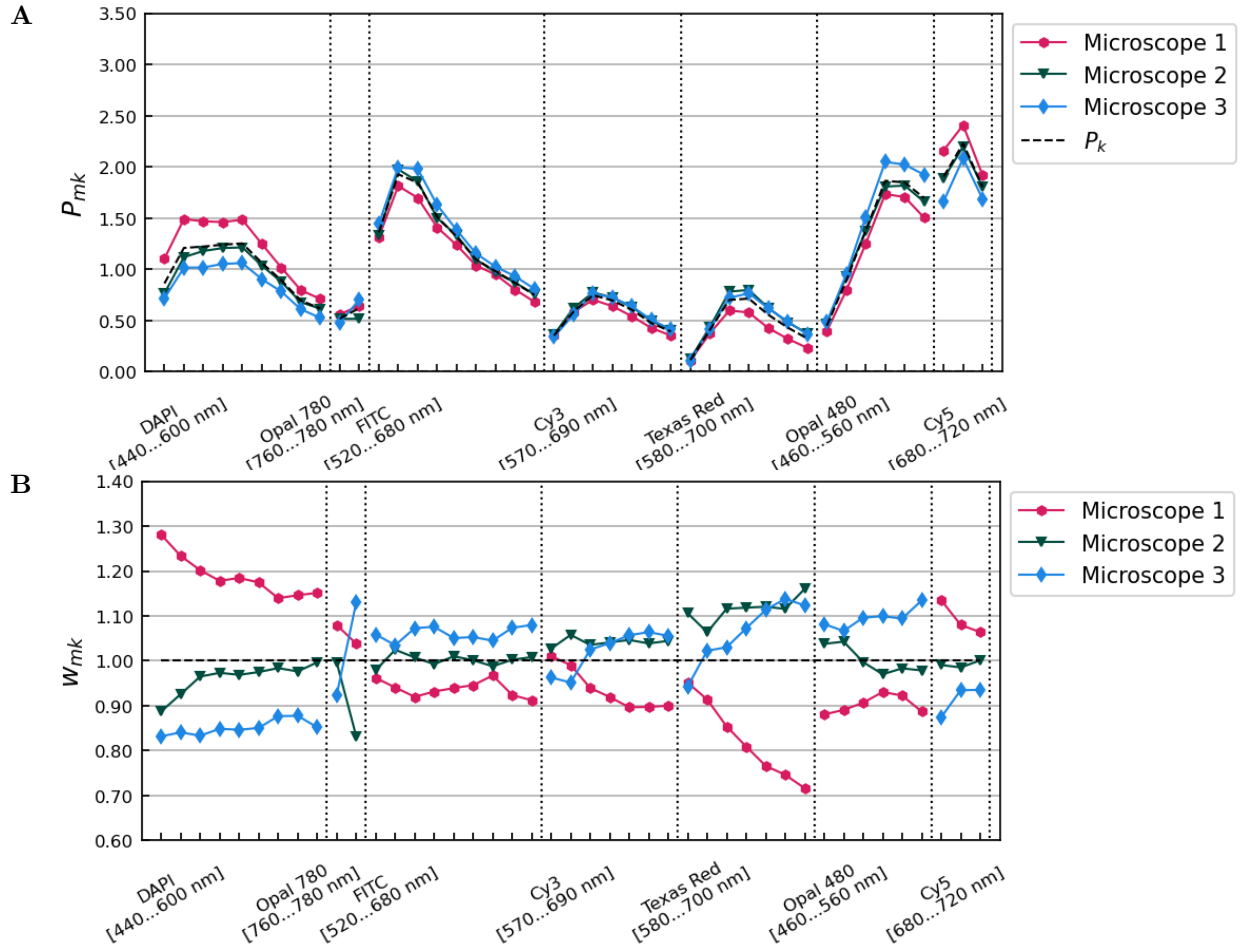

**Figure S3:** (A) The  $P_{mk}$  spectra representing relative variations about the mean ( $P_k$ ) of all average microscope fluxes. (B) The  $w_{mk}$  correction factors.

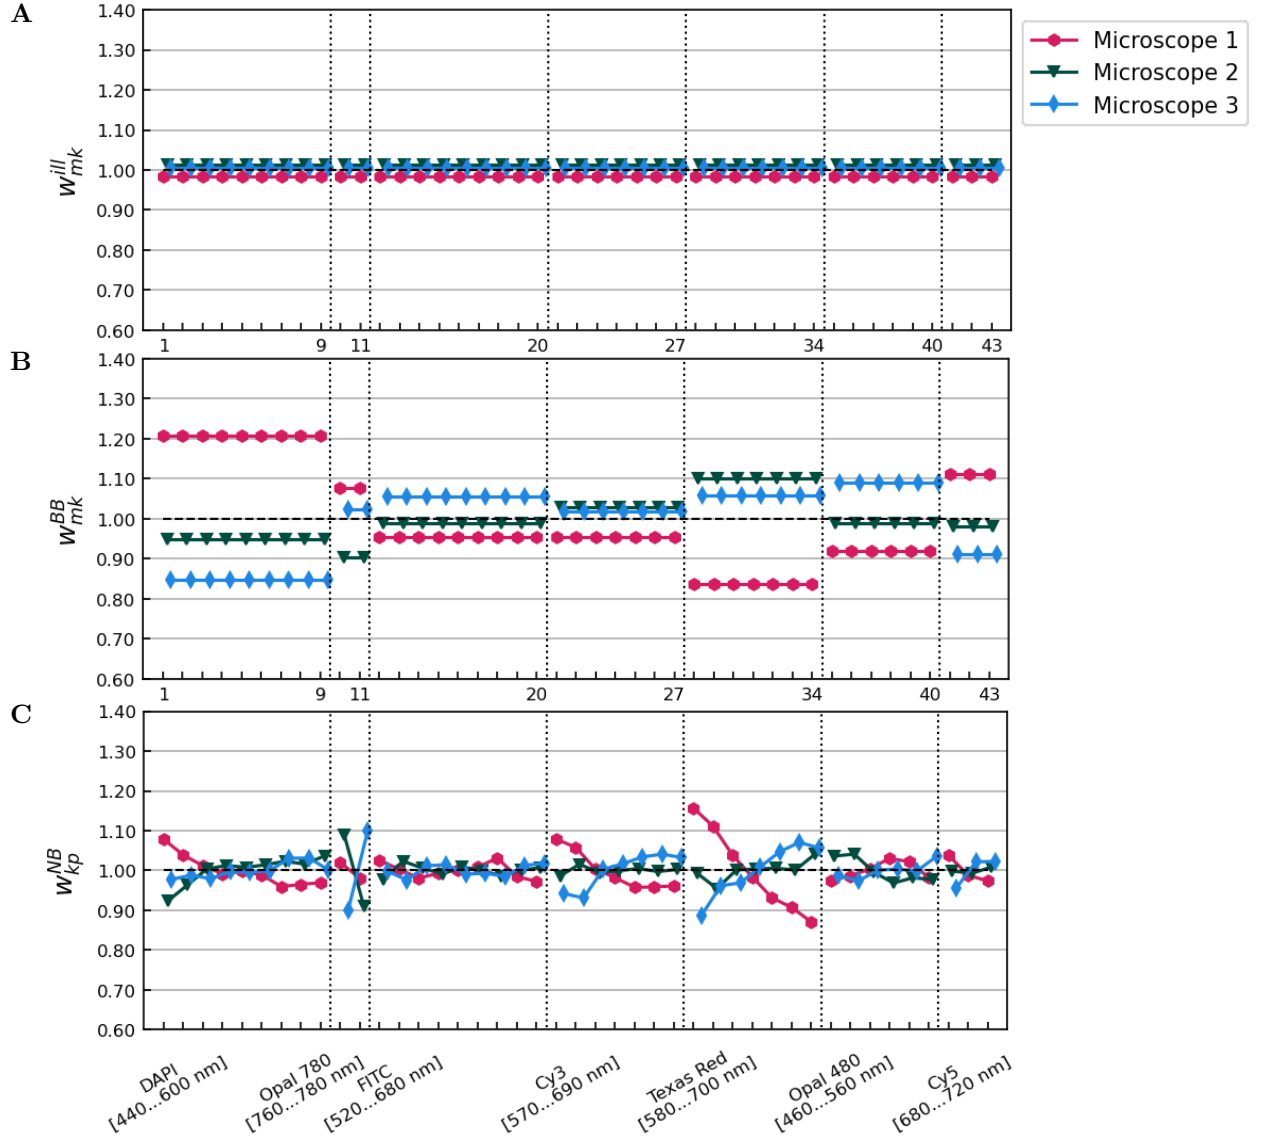

**Figure S4:** The factorized  $w_m^{ill}$  (A),  $w_{mk}^{BB}$  (B), and  $w_{mk}^{NB}$  (C) contributions to the total  $w_{mk}$  correction factors, showing that most of the wavelength-dependent differences between microscopes are limited to inhomogeneities between the broadband filters installed in each microscope.

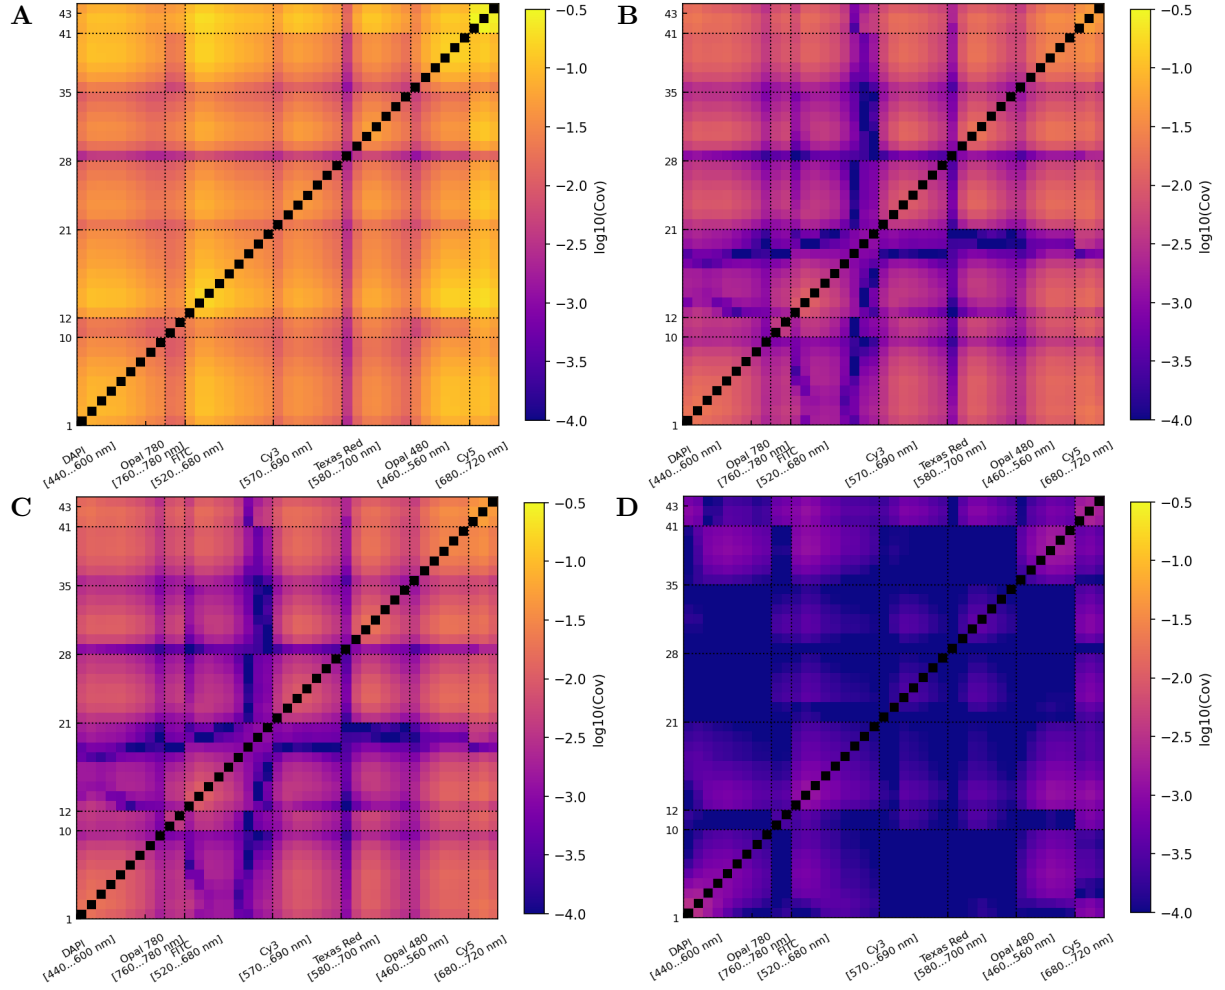

**Figure S5:** The image layer-projected covariance matrices at each stage of correction: (A)  $\Sigma_{k_1 k_2}(X)$  (normalization only), (B)  $\Sigma_{k_1 k_2}(x)$  (after amplitude correction), (C)  $\Sigma_{k_1 k_2}(y)$  (after correction with tissue profiles), and (D)  $\Sigma_{k_1 k_2}(z)$  (after correction with microscope profiles).

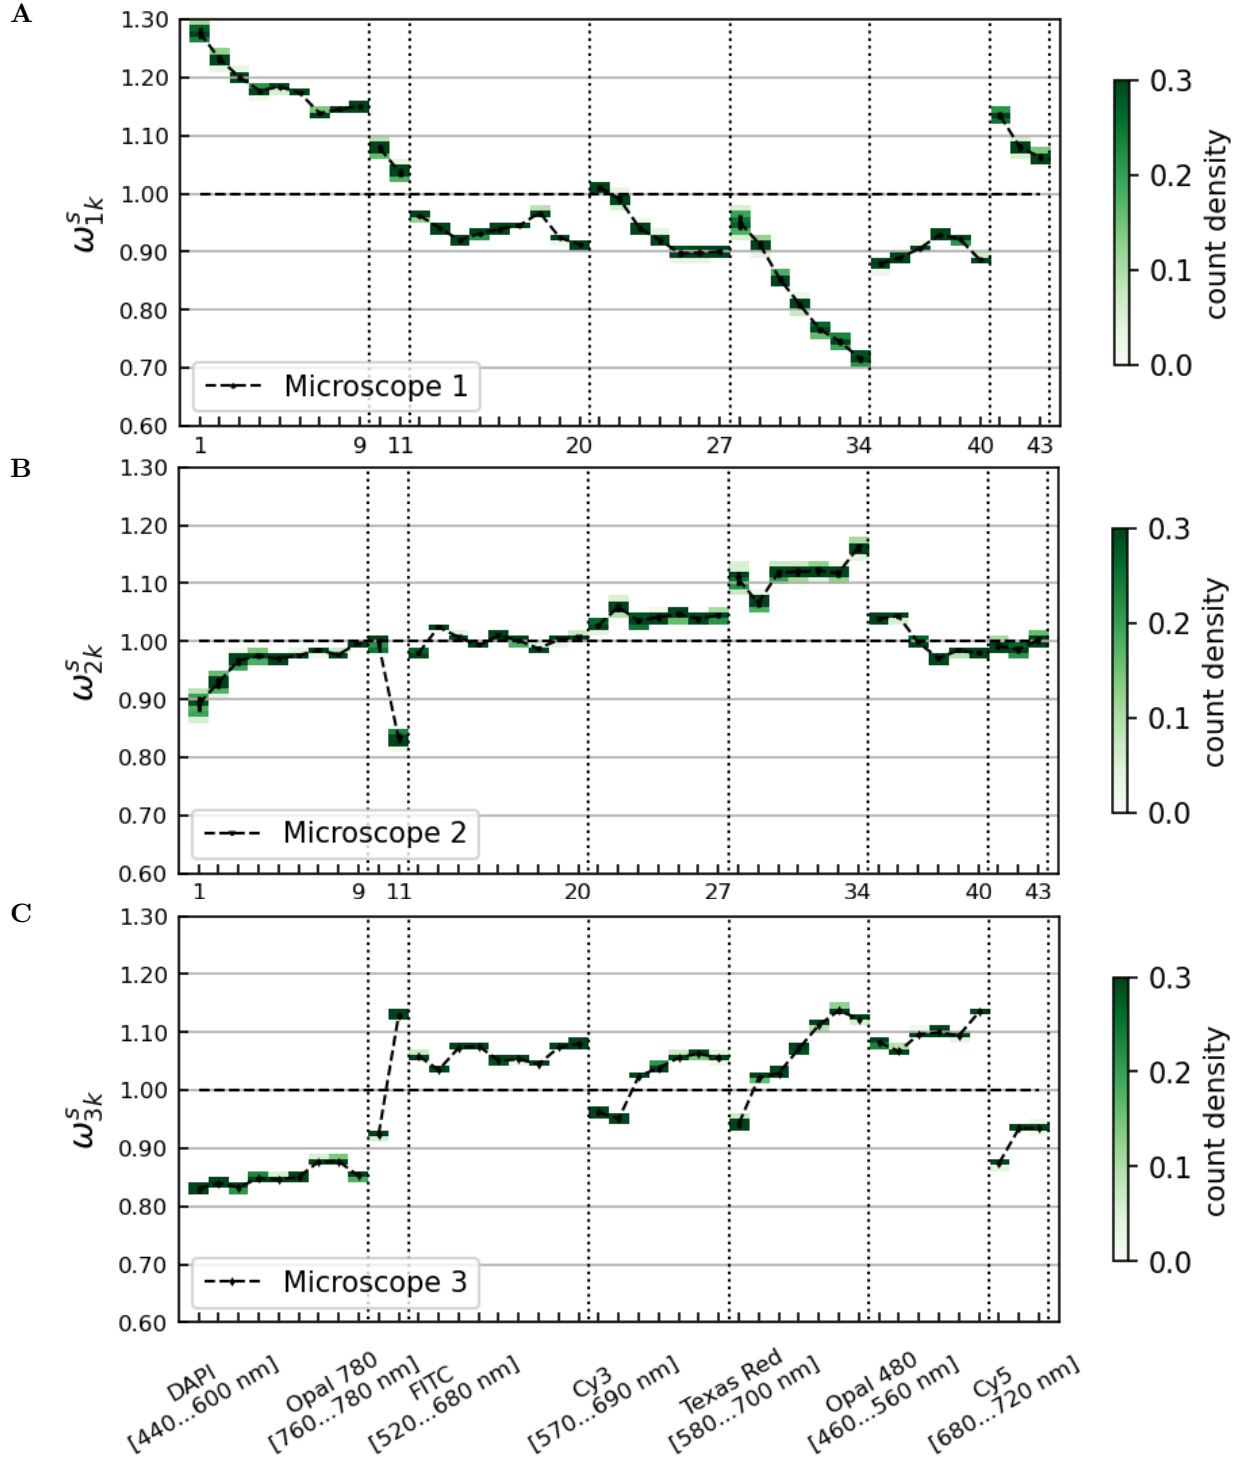

**Figure S6:** The microscope-dependent  $C_m^s \omega_{mk}^s$  correction factors found in each iteration of the bootstrapping procedure for microscopes 1 (A), 2 (B), and 3 (C). The means of the distributions found are plotted as data points with standard deviation-sized error bars on top of a density histogram showing the spread of all values.

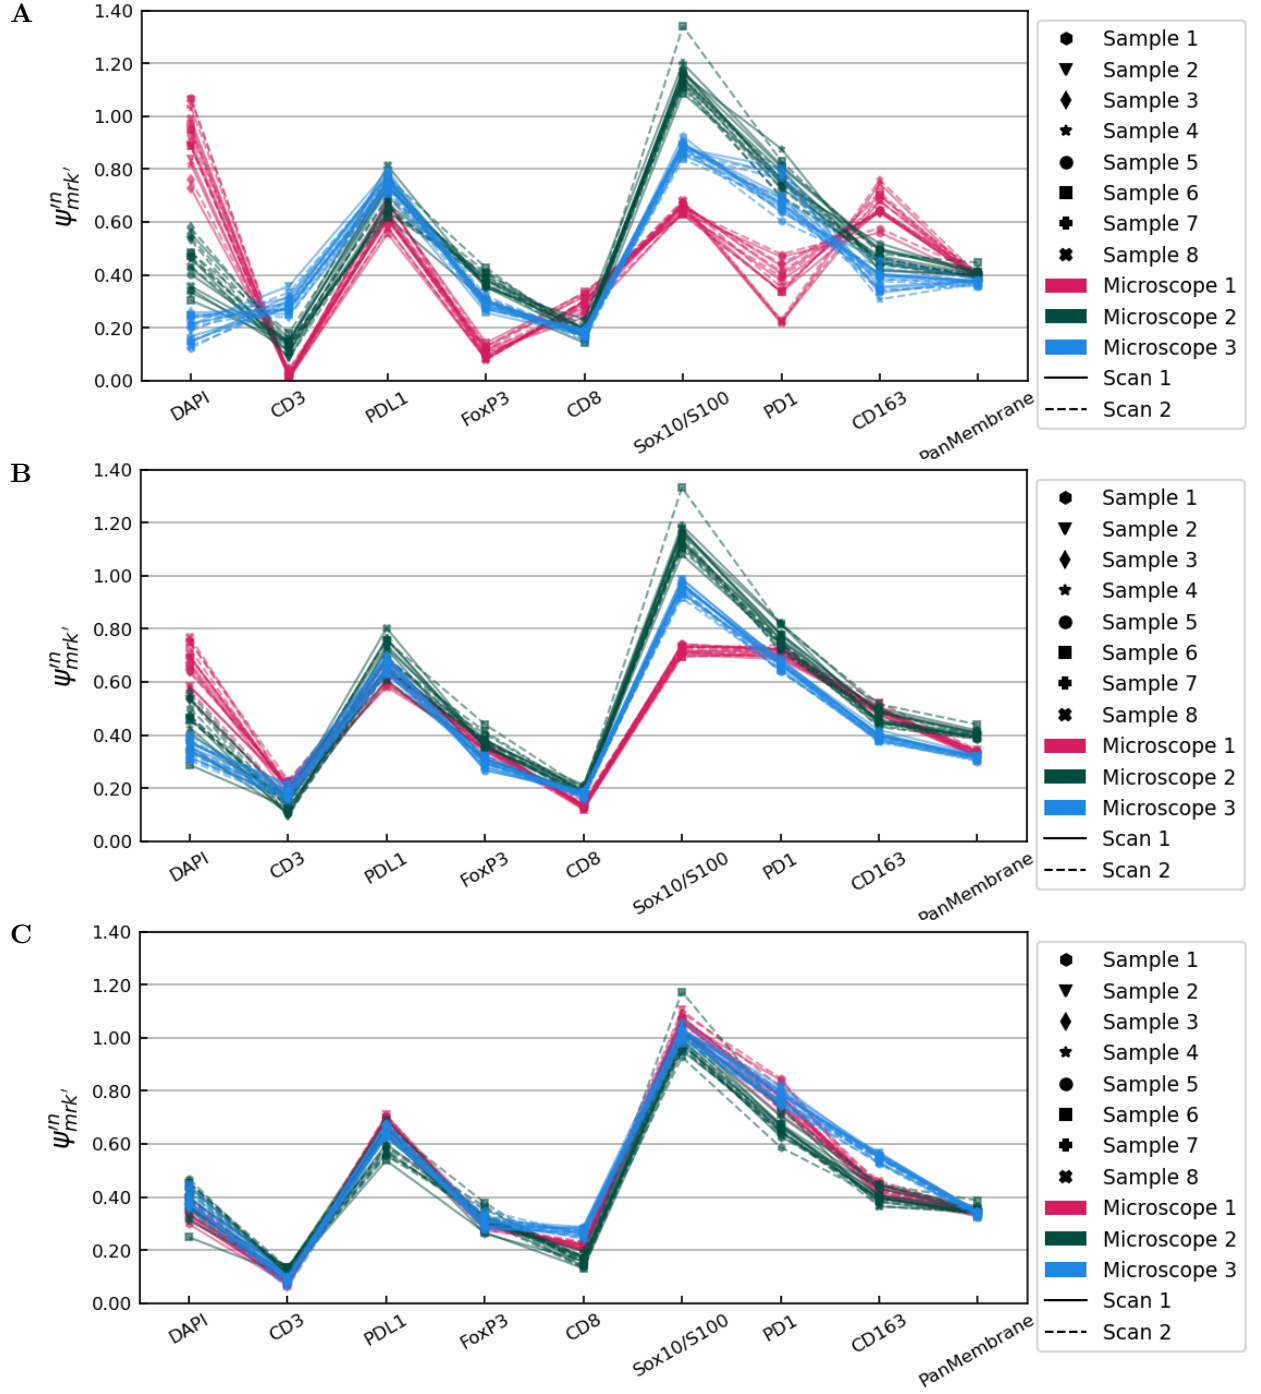

**Figure S7:** (A) The  $\psi_{mrk'}^i$  spectra obtained by unmixing raw images using a single library from microscope 2. (B) The  $\psi_{mrk'}^i$  spectra obtained by unmixing raw images using libraries corresponding to each imaging microscope. (C) The  $\psi_{mrk'}^i$  spectra obtained by applying factors to standardize data from multiple microscopes to the microscope 2 reference, and unmixing the standardized images using the microscope 2 library. Data from different microscopes are plotted in different colors. Solid and dashed lines show data from scans 1 and 2, respectively. Individual tissue samples are distinguished using different marker styles, as shown in the legend.
